# Supplementary material for: Effects of Lidocaine-Derived Organic Compounds on Eosinophil Activation and Survival
Source: MDPI journal article supplement (doi:10.3390/molecules28155696), 2023-07-27
Supplement: s1 [file s1]

Table S1. Structures of synthesized modified lidocaine compounds.

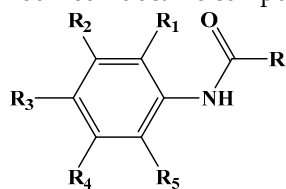

| Compound<br>(M.Wt.) | R                               | R <sub>1</sub>  | R <sub>2</sub>  | R <sub>3</sub>  | R <sub>4</sub>  | R <sub>5</sub>  |
|---------------------|---------------------------------|-----------------|-----------------|-----------------|-----------------|-----------------|
| <b>EI 137</b>       | <i>p</i> -Chlorophenyl          | CH <sub>3</sub> | H               | H               | H               | CH <sub>3</sub> |
| EI 203              | n-Hexyl                         | CH <sub>3</sub> | CH <sub>3</sub> | H               | H               | H               |
| EI 212              | Cyclopropyl                     | CH <sub>3</sub> | CH <sub>3</sub> | H               | H               | H               |
| EI 215              | Cyclohexyl                      | CH <sub>3</sub> | CH <sub>3</sub> | H               | H               | H               |
| EI 221              | Phenyl                          | CH <sub>3</sub> | CH <sub>3</sub> | H               | H               | H               |
| EI 227              | <i>p</i> -Nitrophenyl           | CH <sub>3</sub> | CH <sub>3</sub> | H               | H               | H               |
| EI 228              | <i>o</i> -Nitrophenyl           | CH <sub>3</sub> | CH <sub>3</sub> | H               | H               | H               |
| EI 234              | <i>p</i> -Hydroxyphenyl         | CH <sub>3</sub> | CH <sub>3</sub> | H               | H               | H               |
| EI 301              | n-Pentyl                        | CH <sub>3</sub> | H               | CH <sub>3</sub> | H               | H               |
| EI 305              | C <sub>17</sub> H <sub>35</sub> | CH <sub>3</sub> | H               | CH <sub>3</sub> | H               | H               |
| EI 306              | C <sub>15</sub> H <sub>31</sub> | CH <sub>3</sub> | H               | CH <sub>3</sub> | H               | H               |
| EI 321              | Phenyl                          | CH <sub>3</sub> | H               | CH <sub>3</sub> | H               | H               |
| EI 327              | <i>p</i> -Nitrophenyl           | CH <sub>3</sub> | H               | CH <sub>3</sub> | H               | H               |
| EI 328              | <i>o</i> -Nitrophenyl           | CH <sub>3</sub> | H               | CH <sub>3</sub> | H               | H               |
| EI 337              | <i>p</i> -Chlorophenyl          | CH <sub>3</sub> | H               | CH <sub>3</sub> | H               | H               |
| <b>EI 341</b>       | <i>o</i> -Chlorophenyl          | CH <sub>3</sub> | H               | CH <sub>3</sub> | H               | H               |
| EI 401              | n-Butyl                         | CH <sub>3</sub> | H               | H               | CH <sub>3</sub> | H               |
| EI 405              | C <sub>17</sub> H <sub>35</sub> | CH <sub>3</sub> | H               | H               | CH <sub>3</sub> |                 |
| EI 412              | Cyclopropyl                     | CH <sub>3</sub> | H               | H               | CH <sub>3</sub> | H               |
| EI 427              | <i>p</i> -Nitrophenyl           | CH <sub>3</sub> | H               | H               | CH <sub>3</sub> | H               |
| EI 428              | <i>o</i> -Nitrophenyl           | CH <sub>3</sub> | H               | H               | CH <sub>3</sub> | H               |
| EI 435              | <i>o</i> -Hydroxyphenyl         | CH <sub>3</sub> | H               | H               | CH <sub>3</sub> | H               |
| EI 502              | n-Butyl                         | CH <sub>3</sub> | H               | H               | CH <sub>3</sub> | H               |
| EI 503              | n-Hexyl                         | H               | CH <sub>3</sub> | CH <sub>3</sub> | H               | H               |
| EI 505              | C <sub>17</sub> H <sub>35</sub> | H               | CH <sub>3</sub> | CH <sub>3</sub> | H               | H               |
| EI 506              | C <sub>15</sub> H <sub>31</sub> | H               | CH <sub>3</sub> | CH <sub>3</sub> | H               | H               |
| EI 521              | Phenyl                          | H               | CH <sub>3</sub> | CH <sub>3</sub> | H               | H               |
| EI 522              | 2-Methylpropyl                  | H               | CH <sub>3</sub> | CH <sub>3</sub> | H               | H               |
| EI 528              | <i>o</i> -Nitrophenyl           | H               | CH <sub>3</sub> | CH <sub>3</sub> | H               | H               |
| EI 615              | Cyclohexyl                      | H               | CH <sub>3</sub> | CH <sub>3</sub> | H               | H               |
| EI 627              | <i>p</i> -Nitrophenyl           | H               | CH <sub>3</sub> | H               | CH <sub>3</sub> | H               |
| EI 628              | <i>o</i> -Nitrophenyl           | H               | CH <sub>3</sub> | H               | CH <sub>3</sub> | H               |
| EI 636              | 2-Hydroxy-4-chlorophenyl        | H               | CH <sub>3</sub> | H               | CH <sub>3</sub> | H               |
| EI 637              | <i>p</i> -Chlorophenyl          | H               | CH <sub>3</sub> | H               | CH <sub>3</sub> | H               |
| EI 641              | <i>o</i> -Chlorophenyl          | H               | CH <sub>3</sub> | H               | CH <sub>3</sub> | H               |

Table S2. Yields, melting points, and spectral data of the synthesized compounds.

**4-Chloro-N-(2,6-dimethylphenyl)benzamide (EI137)**

Yield : 20 %

MP: 175-177°C (Reported 174-176 °C)

<sup>1</sup>H NMR (90 MHz, CDCl<sub>3</sub>, δ ppm): 2.35 (s, 6H, (CH<sub>3</sub>)<sub>2</sub> C<sub>6</sub>H<sub>3</sub>), 6.80-7.85 (m, 8H, C<sub>6</sub>H<sub>3</sub>, C<sub>6</sub>H<sub>4</sub> & NH).

**N-(2,3-dimethylphenyl)heptanamide (EI203)**

Yield: 55%;

MP: 86.5 – 87°C

<sup>13</sup>C NMR (100 MHz, DMSO, δ ppm): 14.40 (CH<sub>3</sub>-CH<sub>2</sub>-), 20.63, 22.51, 25.80, 28.82 (CH<sub>3</sub>-(CH<sub>2</sub>)<sub>4</sub>-), 36.17 (CO-CH<sub>2</sub>-), 124.18, 125.54, 127.22, 131.64, 136.73, 137.28 (Aryl Carbons), 171.65 (CO-NH).

CHN analysis: Found/Calcd: C, 77.40; H, 10.14; N, 5.87 (C, 77.21; H, 9.93; N, 6.00)

**N-(2,3-dimethylphenyl)cyclopropanecarboxamide (EI212)**

Yield: 19%;

MP: 138 - 140°C;

<sup>1</sup>H NMR (90 MHz, CDCl<sub>3</sub>, δ ppm): 0.60-0.90 (m, 2H, CHHCHHCHCO), 0.90-1.30 (m, 2H, CHHCHHCHCO), 1.30-1.80 (m, 1H, COCH), 2.10 (s, 3H, 2-CH<sub>3</sub>C<sub>6</sub>H<sub>3</sub>), 2.25 (s, 3H, 3-CH<sub>3</sub>C<sub>6</sub>H<sub>3</sub>), 6.70-7.50 (m, 4H, C<sub>6</sub>H<sub>3</sub> & NH).

<sup>13</sup>C NMR (100 MHz, DMSO, δ ppm): 14.35, 14.47 (CH<sub>2</sub>)<sub>2</sub>, 20.65, (CO-CH<sub>2</sub>-), 123.91, 125.55, 127.12, 131.34, 136.74, 137.29 (Aryl Carbons), 172.07 (CO-NH).

CHN analysis: C, 76.48; H, 8.15; N, 7.65 (C, 76.16; H, 7.99; N, 7.40)

**N-(2,3-dimethylphenyl)cyclohexanecarboxamide (EI215)**

Yield: 40 %

MP: 161 – 164°C (Reported 162-163°C)

<sup>1</sup>H NMR (60 MHz, CDCl<sub>3</sub>, δ ppm): 1.06-2.20 (m, 10H, (CH<sub>2</sub>)<sub>5</sub>), 2.26 (s, 3H, 2-CH<sub>3</sub>C<sub>6</sub>H<sub>3</sub>), 2.43 (s, 3H, 3-CH<sub>3</sub>C<sub>6</sub>H<sub>3</sub>), 2.30-2.53 (m, 1H, COCH), 6.86-7.60 (m, 4H, C<sub>6</sub>H<sub>3</sub> & NH).

**N-(2,3-dimethylphenyl)benzamide (EI221)**

Yield : 98 %

MP: 189-191°C (CAS NO 3096-94-4)

<sup>1</sup>H NMR (60 MHz, CDCl<sub>3</sub>, δ ppm): 2.66 (s, 3H, 2-CH<sub>3</sub>C<sub>6</sub>H<sub>3</sub>), 2.80 (s, 3H, 3-CH<sub>3</sub>C<sub>6</sub>H<sub>3</sub>), 7.40-8.53 (m, 9H, (CH<sub>3</sub>)<sub>2</sub>C<sub>6</sub>H<sub>3</sub>, C<sub>6</sub>H<sub>5</sub> & NH).

**N-(2,3-dimethylphenyl)-4-nitrobenzamide (EI227)**

Yield%: 20 %

MP: 207 – 209°C CAS Registry Number 35709-76-3

<sup>1</sup>H NMR (60 MHz, CDCl<sub>3</sub>, δ ppm): 2.33 (s, 3H, 2-CH<sub>3</sub>C<sub>6</sub>H<sub>3</sub>), 2.46 (s, 3H, 3-CH<sub>3</sub>C<sub>6</sub>H<sub>3</sub>), 7.10-7.80 (m, 4H, (CH<sub>3</sub>)<sub>2</sub>C<sub>6</sub>H<sub>3</sub> & NH), 7.96-8.43 (dd, 4H, 4-NO<sub>2</sub>C<sub>6</sub>H<sub>4</sub>).

**N-(2,3-dimethylphenyl)-2-nitrobenzamide (EI228)**

Yield: 16%

MP: 178°C (Reported 177 – 179°C)

<sup>1</sup>H NMR (60 MHz, CDCl<sub>3</sub>, δ ppm): 2.20 (s, 3H, 2-CH<sub>3</sub>C<sub>6</sub>H<sub>3</sub>), 2.35 (s, 3H, 3-CH<sub>3</sub>C<sub>6</sub>H<sub>3</sub>), 6.90-7.70 (m, 7H, (CH<sub>3</sub>)<sub>2</sub>C<sub>6</sub>H<sub>3</sub> & 2-NO<sub>2</sub>C<sub>6</sub>H<sub>4</sub>), 7.90-8.10 (s, 1H, NH).

**4-Hydroxy-N-(2,3-dimethylphenyl)benzamide (EI234)**

Yield: 26 %

MP: 150 – 152°C CAS Registry Number 459419-70-6

<sup>1</sup>H NMR (60 MHz, CDCl<sub>3</sub>, δ ppm): 2.26 (s, 3H, 2-CH<sub>3</sub>C<sub>6</sub>H<sub>3</sub>), 2.36 (s, 3H, 3-CH<sub>3</sub>C<sub>6</sub>H<sub>3</sub>), 6.90-8.10 (m, 9H, (CH<sub>3</sub>)<sub>2</sub>C<sub>6</sub>H<sub>3</sub> & 4-OHC<sub>6</sub>H<sub>4</sub>, OH & NH).

<sup>13</sup>C NMR (100 MHz, DMSO, δ ppm): 65.85 (CH<sub>3</sub>)<sub>2</sub>C<sub>6</sub>H<sub>3</sub>), 121.79, 125.18, 125.74, 128.09, 129.71, 132.83, 133.22, 136.61, 137.49, 153.12 (Aryl Carbons), 164.99 (C=O-NH).

**N-(2,4-dimethylphenyl)hexanamide (EI301)**

Yield: 26%

MP: 101-102°C CAS Registry Number 324067-84-7

<sup>1</sup>H-NMR (400 MHz, CDCl<sub>3</sub>, δ ppm): 0.82-0.85 (t, 3H, CH<sub>2</sub>CH<sub>3</sub>), 1.27-1.89 (m, 4H, (CH<sub>2</sub>)<sub>2</sub>CH<sub>3</sub>), 1.63-1.66 (m, 2H, CH<sub>2</sub>CH<sub>2</sub>CO), 2.12 (s, 3H, 2-CH<sub>3</sub>C<sub>6</sub>H<sub>3</sub>), 2.20 (s, 3H, 4-CH<sub>3</sub>C<sub>6</sub>H<sub>3</sub>), 2.26- 2.30 (t, 2H, COCH<sub>2</sub>), 6.91 (m, 2H, C<sub>6</sub>H<sub>3</sub>), 6.98 (Hump, H, NH), 6.46-6.48 (m, 1H, C<sub>6</sub>H<sub>3</sub>).

<sup>13</sup>C-NMR (101 MHz, CDCl<sub>3</sub>, δ ppm): 14.00, 17.80, 20.90, 22.47, 24.66, 31.49, 37.51, 123.83, 127.51, 129.77, 131.12, 133.02, 135.00.

**N-(2,4-dimethylphenyl)stearamide (EI305)**

Yield: 30%;

MP: 83.5 – 85°C;

<sup>1</sup>H NMR (90 MHz, CDCl<sub>3</sub>, δ ppm): 0.95 (t, 3H, CH<sub>2</sub>CH<sub>3</sub>), 1.1-1.9 (m, 30H, (CH<sub>2</sub>)<sub>15</sub>CH<sub>3</sub>), 2.15 (s, 3H, 2-CH<sub>3</sub>C<sub>6</sub>H<sub>3</sub>), 2.25 (s, 3H, 4-CH<sub>3</sub>C<sub>6</sub>H<sub>3</sub>), 2.3 (t, 2H, COCH<sub>2</sub>), 6.80-7.20 (m, 3H, C<sub>6</sub>H<sub>3</sub>), 7.30-7.50 (br s, 1H, NH).

Elemental analyses calculated for C<sub>26</sub>H<sub>45</sub>NO C, 80.56; H, 11.7; N, 3.61. Found C, 80.72; H 11.89; N 3.88.

**N-(2,4-dimethylphenyl)palmitamide (EI306)**

Yield: 28.5%;

MP: 99 – 102°C;

<sup>1</sup>H NMR (90 MHz, CDCl<sub>3</sub>, δ ppm): 0.85 (t, 3H, CH<sub>2</sub>CH<sub>3</sub>), 1.10-1.90 (m, 26H, (CH<sub>2</sub>)<sub>13</sub>CH<sub>3</sub>), 2.20 (s, 3H, 2-CH<sub>3</sub>C<sub>6</sub>H<sub>3</sub>), 2.25 (s, 3H, 4-CH<sub>3</sub>C<sub>6</sub>H<sub>3</sub>), 2.30 (t, 2H, COCH<sub>2</sub>), 6.70-7.20 (m, 3H, C<sub>6</sub>H<sub>3</sub>), 7.35-7.55 (br s, 1H, NH).

Elemental analyses calculated for C<sub>24</sub>H<sub>41</sub>NO C, 80.16; H, 11.49; N, 3.9. Found C, 80.43; H 11.65; N 4.11.

**N-(2,4-dimethylphenyl)benzamide (EI321)**

Yield: 98%;

MP: 186-189°C; (reported 193-194°C)

<sup>1</sup>H NMR (60 MHz, CDCl<sub>3</sub>, δ ppm): 2.33 (s, 3H, 2-CH<sub>3</sub>C<sub>6</sub>H<sub>3</sub>), 2.36 (s, 3H, 4-CH<sub>3</sub>C<sub>6</sub>H<sub>3</sub>), 6.86-8.10 (m, 9H, C<sub>6</sub>H<sub>5</sub>, C<sub>6</sub>H<sub>5</sub>, NH).

**N-(2,4-dimethylphenyl)-4-nitrobenzamide, (EI327)**

Yield: 28%;

MP: 166-169°C

<sup>1</sup>H NMR (90 MHz, CDCl<sub>3</sub>, δ ppm): 2.17 (s, 3H, 2-CH<sub>3</sub>C<sub>6</sub>H<sub>3</sub>), 2.25 (s, 3H, 4-CH<sub>3</sub>C<sub>6</sub>H<sub>3</sub>), 7.15-7.88 (m, 4H, (CH<sub>3</sub>)<sub>2</sub>C<sub>6</sub>H<sub>3</sub> & NH), 7.99-8.53 (dd, 4H, 4-NO<sub>2</sub>C<sub>6</sub>H<sub>4</sub>).

**N-(2,4-dimethylphenyl)-2-nitrobenzamide, (EI328)**

Yield: 25 %;

MP: 161-162°C (Reported 161-163°C)

<sup>1</sup>H NMR (90 MHz, CDCl<sub>3</sub>, δ ppm): 2.15 (s, 3H, 2-CH<sub>3</sub>C<sub>6</sub>H<sub>3</sub>), 2.23 (s, 3H, 4-CH<sub>3</sub>C<sub>6</sub>H<sub>3</sub>), 7.10-7.90 (m, 4H, (CH<sub>3</sub>)<sub>2</sub>C<sub>6</sub>H<sub>3</sub> & NH), 7.97-8.55 (dd, 4H, 4-NO<sub>2</sub>C<sub>6</sub>H<sub>4</sub>).

**N-4-chloro-N-(2,4-dimethylphenyl)benzamide (EI337)**

Yield: 20%;

MP: 167-8°C

<sup>1</sup>H NMR (90 MHz, CDCl<sub>3</sub>, δ ppm): 2.18 (s, 3H, 2-CH<sub>3</sub>C<sub>6</sub>H<sub>3</sub>), 2.27 (s, 3H, 5-CH<sub>3</sub>C<sub>6</sub>H<sub>3</sub>), 6.80-7.20 (m, 3H, C<sub>6</sub>H<sub>3</sub>), 7.50-7.60 (br s, 1H, NH), 7.30-7.80 (dd, 4H, C<sub>6</sub>H<sub>4</sub>)

**N-2-chloro-N-(2,4-dimethylphenyl)benzamide (EI341)**

Yield: 46.5%;

MP: 163-165°C

<sup>1</sup>H NMR (60 MHz, CDCl<sub>3</sub>, δ ppm): 2.20 (s, 6H, (CH<sub>3</sub>)<sub>2</sub>), 6.90-8.00 (m, 8H, (CH<sub>3</sub>)<sub>2</sub>C<sub>6</sub>H<sub>3</sub>, 2-ClC<sub>6</sub>H<sub>4</sub> & NH).

**N-(2,5-dimethylphenyl)pentanamide (EI401)**

Yield: 35.0%;

MP: 129.5°C;

<sup>1</sup>H NMR (90 MHz, CDCl<sub>3</sub>, δ ppm): 0.90 (t, 3H, CH<sub>2</sub>CH<sub>3</sub>), 1.10-1.90 (m, 4H, CH<sub>2</sub>CH<sub>2</sub>CH<sub>3</sub>), 2.18 (s, 3H, 2-CH<sub>3</sub>C<sub>6</sub>H<sub>3</sub>), 2.35 (s, 3H, 5-CH<sub>3</sub>C<sub>6</sub>H<sub>3</sub>), 2.35 (t, 2H, COCH<sub>2</sub>), 6.70-7.30 (m, 3H, C<sub>6</sub>H<sub>3</sub>), 7.40-7.60 (br s, 1H, NH).

**N-(2,5-dimethylphenyl)stearamide (EI405)**

Yield: 16.5%;

MP: 187.5°C;

<sup>1</sup>H NMR (90 MHz, CDCl<sub>3</sub>, δ ppm): 0.90 (t, 3H, CH<sub>2</sub>CH<sub>3</sub>), 1.10-2.00 (m, 30H, (CH<sub>2</sub>)<sub>15</sub>CH<sub>3</sub>), 2.20 (s, 3H, 2-CH<sub>3</sub>C<sub>6</sub>H<sub>3</sub>), 2.33 (s, 3H, 5-CH<sub>3</sub>C<sub>6</sub>H<sub>3</sub>), 2.40 (t, 2H, COCH<sub>2</sub>), 6.70-7.23 (m, 3H, C<sub>6</sub>H<sub>3</sub>), 7.43-7.66 (brs, 1H, NH).

**N-(2,5-dimethylphenyl)cyclopentanecarboxamide (EI412)**

Yield: 25.3 %;

MP: 169-170°C;

<sup>1</sup>H-NMR (400 MHz, CDCl<sub>3</sub>, δ ppm): 0.856-0.865(m, 3H, (CH<sub>2</sub>)<sub>4</sub>-cyclopentane), 1.088-1.12(m, 3H, (CH<sub>2</sub>)<sub>4</sub>-cyclopentane), 1.55(m, 2H, (CH<sub>2</sub>)<sub>4</sub>-cyclopentane), 1.9(m, 1H, CHCO), 2.26 (s, 3H, (CH<sub>3</sub>)C<sub>6</sub>H<sub>3</sub>), 2.32(s, 3H, (CH<sub>3</sub>)C<sub>6</sub>H<sub>3</sub>), 6.88-7.03 (m, 2H, C<sub>6</sub>H<sub>3</sub>), 7.123((Hump, 1H, NH), 7.69 (m, 1H, C<sub>6</sub>H<sub>3</sub>).

<sup>13</sup>C-NMR (101 MHz, CDCl<sub>3</sub>, δ ppm): 7.89, 15.61, 17.38, 21.11, 123.52, 125.39, 125.60, 130.19, 135.70, 136.45, 171.89.

Elemental analyses calculated for C<sub>14</sub>H<sub>19</sub>NO C, 77.38; H, 8.81; N, 6.45. Found C 76.4, H 8.16, N 7.68

**N-(2,5-dimethylphenyl)-4-nitrobenzamide (EI427)**

Yield: 15 %

MP: 117-8°C

<sup>1</sup>H NMR (90 MHz, CDCl<sub>3</sub>, δ ppm): 2.33 (s, 3H, 2-CH<sub>3</sub>C<sub>6</sub>H<sub>3</sub>), 2.40 (s, 3H, 5-CH<sub>3</sub>C<sub>6</sub>H<sub>3</sub>), 7.18-7.92 (m, 4H, (CH<sub>3</sub>)<sub>2</sub>C<sub>6</sub>H<sub>3</sub> & NH), 8.10-8.73 (dd, 4H, 4-NO<sub>2</sub>C<sub>6</sub>H<sub>4</sub>).

**N-(2,5-dimethylphenyl)-2-nitrobenzamide, (EI428)**

Yield: 15 %

MP: 175-6°C (Reported MP 173 – 175)

<sup>1</sup>H NMR (90 MHz, CDCl<sub>3</sub>, δ ppm): 2.36 (s, 3H, 2-CH<sub>3</sub>C<sub>6</sub>H<sub>3</sub>), 2.46 (s, 3H, 5-CH<sub>3</sub>C<sub>6</sub>H<sub>3</sub>), 6.90-7.43 (m, 3H, (CH<sub>3</sub>)<sub>2</sub>C<sub>6</sub>H<sub>3</sub>), 7.50-7.86 (m, 4H, 2-NO<sub>2</sub>C<sub>6</sub>H<sub>4</sub>), 8.03-8.23 (br s, 1H, NH).

**N-(2,5-dimethylphenyl)-2-hydroxybenzamide (EI435)**

Yield: 25 %

MP: 95°C (reported 164°C)

<sup>1</sup>H NMR (90 MHz, CDCl<sub>3</sub>, δ ppm): 2.26 (s, 3H, 2-CH<sub>3</sub>C<sub>6</sub>H<sub>3</sub>), 2.40 (s, 3H, 5-CH<sub>3</sub>C<sub>6</sub>H<sub>3</sub>), 6.23-6.43 (br s, 1H, OH), 6.73-7.66 (m, 8H, (CH<sub>3</sub>)<sub>2</sub>C<sub>6</sub>H<sub>3</sub>, 2-OHC<sub>6</sub>H<sub>4</sub> & NH).

**N-(3,4-dimethylphenyl)pentanamide (EI502)**

Yield: 20%

MP: 107 -109°C (reported MP: 109.5–110°C)

<sup>1</sup>H NMR (90 MHz, CDCl<sub>3</sub>, δ ppm): 0.93 (t, 3H, (CH<sub>2</sub>CH<sub>3</sub>), 1.18-1.88 (m, 6H, CH<sub>2</sub>CH<sub>2</sub>CH<sub>2</sub>CH<sub>3</sub>), 2.25 (s, 6H, (CH<sub>3</sub>)<sub>2</sub>C<sub>6</sub>H<sub>3</sub>), 2.36 (t, 2H, COCH<sub>2</sub>), 6.79-7.28 (m, 3H, C<sub>6</sub>H<sub>3</sub>), 7.48-7.67 (br s, 1H, NH).

**N-(3,4-dimethylphenyl) heptamide (EI503)**

Yield: 16%

MP: 116 -119°C

<sup>1</sup>H NMR (90 MHz, CDCl<sub>3</sub>, δ ppm): 0.83 (t, 3H, CH<sub>2</sub>CH<sub>3</sub>), 1.15-1.85 (m, 8H, (CH<sub>2</sub>)<sub>4</sub>CH<sub>3</sub>), 2.24 (s, 6H, (CH<sub>3</sub>)<sub>2</sub>C<sub>6</sub>H<sub>3</sub>), 2.30 (t, 2H, COCH<sub>2</sub>), 7.20 (s, 2H, o-C<sub>6</sub>H<sub>3</sub>), 7.25 (s, 1H, p-C<sub>6</sub>H<sub>3</sub>), 7.27 (hump, 1H, NH).

**N-(3,4-dimethylphenyl) stearamide (EI505)**

Yield: 63.0 %;

MP: 83.9°C

<sup>1</sup>H NMR (400 MHz, CDCl<sub>3</sub>, δ ppm): 0.95 (t, 3H, (CH<sub>2</sub>)<sub>16</sub>CH<sub>3</sub>), 1.32-1.34 (m, 28H, (CH<sub>2</sub>(CH<sub>2</sub>)<sub>14</sub>CH<sub>3</sub>), 1.67-1.76 (m, 2H, COCH<sub>2</sub>CH<sub>2</sub>), 2.23 (d, 6H, C<sub>6</sub>H<sub>3</sub>-(CH<sub>3</sub>)<sub>2</sub>), 2.32 (t, 2H, COCH<sub>2</sub>), 7.18 (s, 2H, o-C<sub>6</sub>H<sub>3</sub>), 7.28 (s, 1H, p-C<sub>6</sub>H<sub>3</sub>), 7.29 (hump, 1H, NH).

Anal Calcd: C, 80.56; H, 11.70; N, 3.61. Found: 80.74, 11.98, 3.88

MS (ES) *m/z* 377.38[M+1]<sup>+</sup>

**N-(3,4-dimethylphenyl)palmitamide (EI506)**

MP: 88°C

Yield: 76 %.

<sup>1</sup>H NMR (90 MHz, CDCl<sub>3</sub>, δ ppm): 0.92 (t, 3H, CH<sub>2</sub>CH<sub>3</sub>), 1.12-2.08 (m, 26H, (CH<sub>2</sub>)<sub>13</sub>CH<sub>3</sub>), 2.21 (s, 6H, (CH<sub>3</sub>)<sub>2</sub>C<sub>6</sub>H<sub>3</sub>), 2.36 (t, 2H, COCH<sub>2</sub>), 6.66-7.16 (m, 3H, C<sub>6</sub>H<sub>3</sub>), 7.33-7.60 (brs, 1H, NH).

Anal Calcd: C, 80.16; H, 11.49; N, 3.90. Found: 79.87, 11.63, 4.13

**N-(3,4-dimethylphenyl)benzamide (EI521)**

Yield: 98 %;

MP: 187-190 °C; (CAS NO 27285-18-3)

<sup>1</sup>H NMR (60 MHz, CDCl<sub>3</sub>, δ ppm): 2.20 (s, 6H, (CH<sub>3</sub>)<sub>2</sub>C<sub>6</sub>H<sub>3</sub>), 6.90-8.16 (m, 9H, (CH<sub>3</sub>)<sub>2</sub>C<sub>6</sub>H<sub>3</sub>, C<sub>6</sub>H<sub>5</sub> & NH).

**3-Methyl-N-(3,4-dimethylphenyl)butanamide (EI522)**

Yield: 76.5 %;

MP: 90-91°C; (CAS NO 349423-12-7 )

<sup>1</sup>H-NMR (90 MHz, CDCl<sub>3</sub>, δ ppm): 0.80-1.30 (m, 1H, CH(CH<sub>3</sub>)<sub>2</sub>), 0.96 (d, 6H, CH(CH<sub>3</sub>)<sub>2</sub>), 2.16 (d, 2H, COCH<sub>2</sub>), 2.20 (s, 6H, C<sub>6</sub>H<sub>3</sub>(CH<sub>3</sub>)<sub>2</sub>), 6.83-7.36 (m, 4H, C<sub>6</sub>H<sub>3</sub> & NH).  
Anal Calcd: C, 76.06; H, 9.33; N, 6.82. Found: 76.34, 9.50, 6.96  
MS (ES) *m/z* 377.38[M+1]<sup>+</sup>

**N-(3,4-dimethylphenyl)-2-nitrobenzamide (EI528)**

Yield: 16.0 %;

MP: 153-155°C

IR (ν cm<sup>-1</sup>, KBr): 3268 (NH), 1655 (C=O);

<sup>1</sup>H NMR (90 MHz, CDCl<sub>3</sub>, δ ppm): 2.20 (s, 6H, C<sub>6</sub>H<sub>3</sub>(CH<sub>3</sub>)<sub>2</sub>), 6.80-8.00 (m, 8H, C<sub>6</sub>H<sub>3</sub>, C<sub>6</sub>H<sub>4</sub> & NH).

**N-(3,5-dimethylphenyl)cyclohexanecarboxamide (EI615)**

Yield: 30 %.

MP: 155°C; (CAS NO 315712-18-6)

<sup>1</sup>H NMR (60 MHz, CDCl<sub>3</sub>, δ ppm): 1.10-2.23 (m, 10H, (CH<sub>2</sub>)<sub>5</sub>), 2.36 (s, 6H, (CH<sub>3</sub>)<sub>2</sub>), 2.40-2.66 (m, 1H, COCH), 6.70-6.86 (br s, 1H, NH), 7.13-7.46 (m, 3H, C<sub>6</sub>H<sub>3</sub>).

Anal Calcd: C, 77.88; H, 9.15; N, 6.05, Found: 78.13, 9.29, 6.31

MS (ES) *m/z* 219.34 [M+1]<sup>+</sup>

**N-(3,5-dimethylphenyl)-4-nitrobenzamide (EI 627)**

Yield : 22 %

MP: 175-177°C

<sup>1</sup>H NMR (90 MHz, CDCl<sub>3</sub>, δ ppm): 2.38 (s, 6H, (CH<sub>3</sub>)<sub>2</sub>), 7.15-7.88 (m, 4H, (CH<sub>3</sub>)<sub>2</sub>C<sub>6</sub>H<sub>3</sub> & NH), 7.99-8.53 (dd, 4H, 4-NO<sub>2</sub>C<sub>6</sub>H<sub>4</sub>).

**N-(3,5-dimethylphenyl)-2-nitrobenzamide (EI 628)**

Yield : 17.6%

MP: 165.5-167°C

<sup>1</sup>H NMR (90 MHz, CDCl<sub>3</sub>, δ ppm): 2.37 (s, 6H, (CH<sub>3</sub>)<sub>2</sub>), 6.90-7.43 (m, 3H, (CH<sub>3</sub>)<sub>2</sub>C<sub>6</sub>H<sub>3</sub>), 7.50-7.86 (m, 4H, 2-NO<sub>2</sub>C<sub>6</sub>H<sub>4</sub>), 8.06-8.28 (br s, 1H, NH).

**4-chloro-2-hydroxy-N-(3,5-dimethylphenyl)benzamide (EI 636)**

Yield : 12%

MP: 208-210.5°C

<sup>1</sup>H NMR (90 MHz, CDCl<sub>3</sub>, δ ppm): 2.36 (s, 6H, (CH<sub>3</sub>)<sub>2</sub>C<sub>6</sub>H<sub>3</sub>), 6.55-7.96 (m, 8H, (CH<sub>3</sub>)<sub>2</sub>C<sub>6</sub>H<sub>3</sub>, 2-OHC<sub>6</sub>H<sub>4</sub>, OH & NH).

**4-chloro-N-(3,5-dimethylphenyl)benzamide (EI 637)**

Yield: 75 %;

MP: 144-145°C; (reported MP 130-133°C)

<sup>1</sup>H NMR (60 MHz, CDCl<sub>3</sub>, δ ppm): 2.33 (s, 6H, (CH<sub>3</sub>)<sub>2</sub>C<sub>6</sub>H<sub>3</sub>), 6.66-6.90 (br s, 1H, NH), 6.93-8.33 (m, 7H, C<sub>6</sub>H<sub>4</sub> & C<sub>6</sub>H<sub>3</sub>).

**2-chloro-N-(3,5-dimethylphenyl)benzamide (EI 641)**

Yield : 17%

MP: 137-139°C

$^1\text{H}$  NMR (60 MHz,  $\text{CDCl}_3$ ,  $\delta$  ppm): 2.36 (s, 6H,  $(\text{CH}_3)_2\text{C}_6\text{H}_3$ ), 7.00-7.93 (m, 8H,  $(\text{CH}_3)_2\text{C}_6\text{H}_3$ , 2- $\text{ClC}_6\text{H}_4$  &  $\text{NH}$ ).

Table S3. Training set for pharmacophore building.

| Test set  |                                                                                     | $\text{IC}_{50}$ ( $\mu\text{M}$ ) |
|-----------|-------------------------------------------------------------------------------------|------------------------------------|
| compounds | Structure                                                                           | Experimental                       |
| I         | 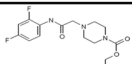   | 0.18                               |
| II        |    | 0.133                              |
| III       |    | 0.257                              |
| IV        |    | 0.257                              |
| V         |    | 0.019                              |
| VI        |   | 0.062                              |
| VII       |  | 0.071                              |
| VIII      |  | 0.25                               |
| IX        |  | 0.161                              |
| X         |  | 0.092                              |
| XI        |  | 0.015                              |
| XII       |  | 0.222                              |
| XIII      |  | 0.106                              |
| XIV       |  | 0.19                               |

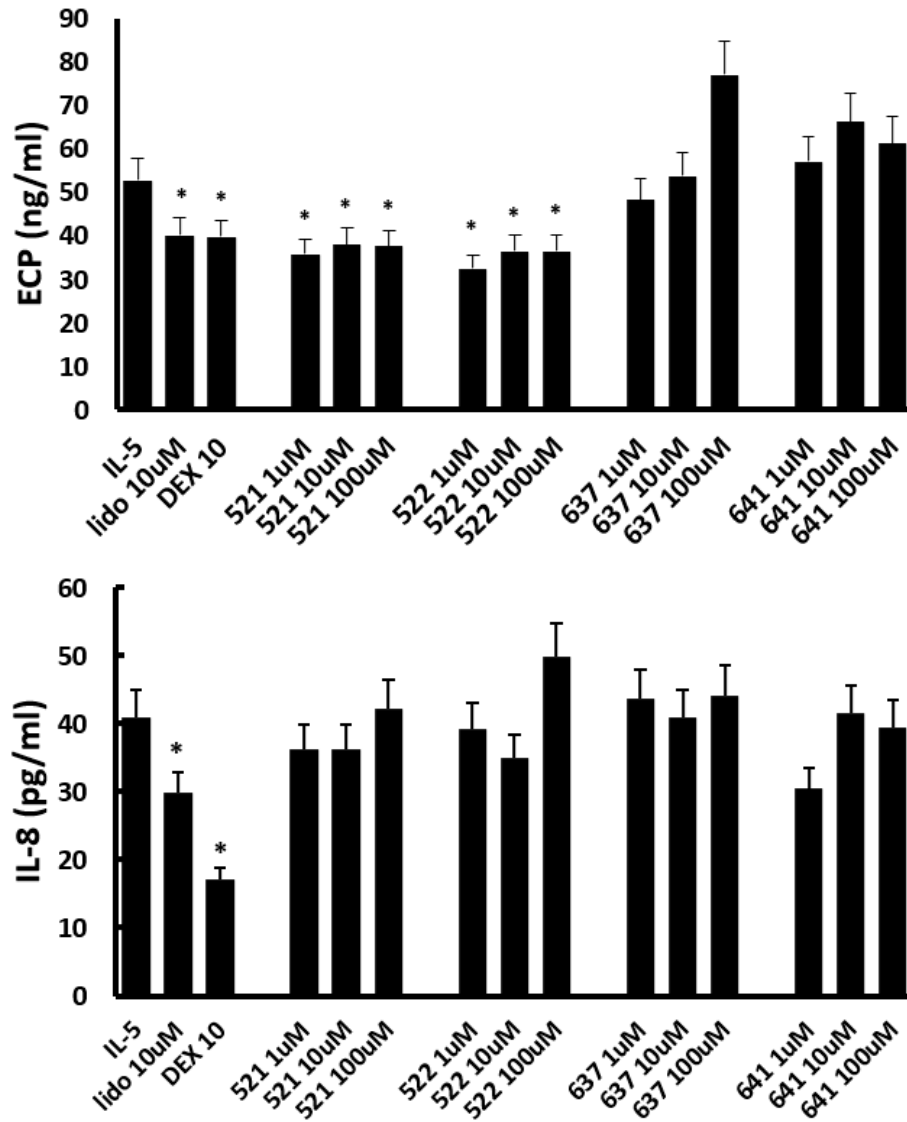

Figure S1. The effects of lidocaine-derived compounds EI521, E522, E637, and EI641 on IL-5-induced ECP and interleukin (IL)-8 production from eosinophils. IL-5-induced ECP production was significantly inhibited by compounds EI521 and EI522. IL-5-induced IL-8 production was not significantly inhibited by the compounds. lido, lidocaine; DEX, dexamethasone; \*  $p < 0.05$  compared with the IL-5 group,  $n = 5$ .

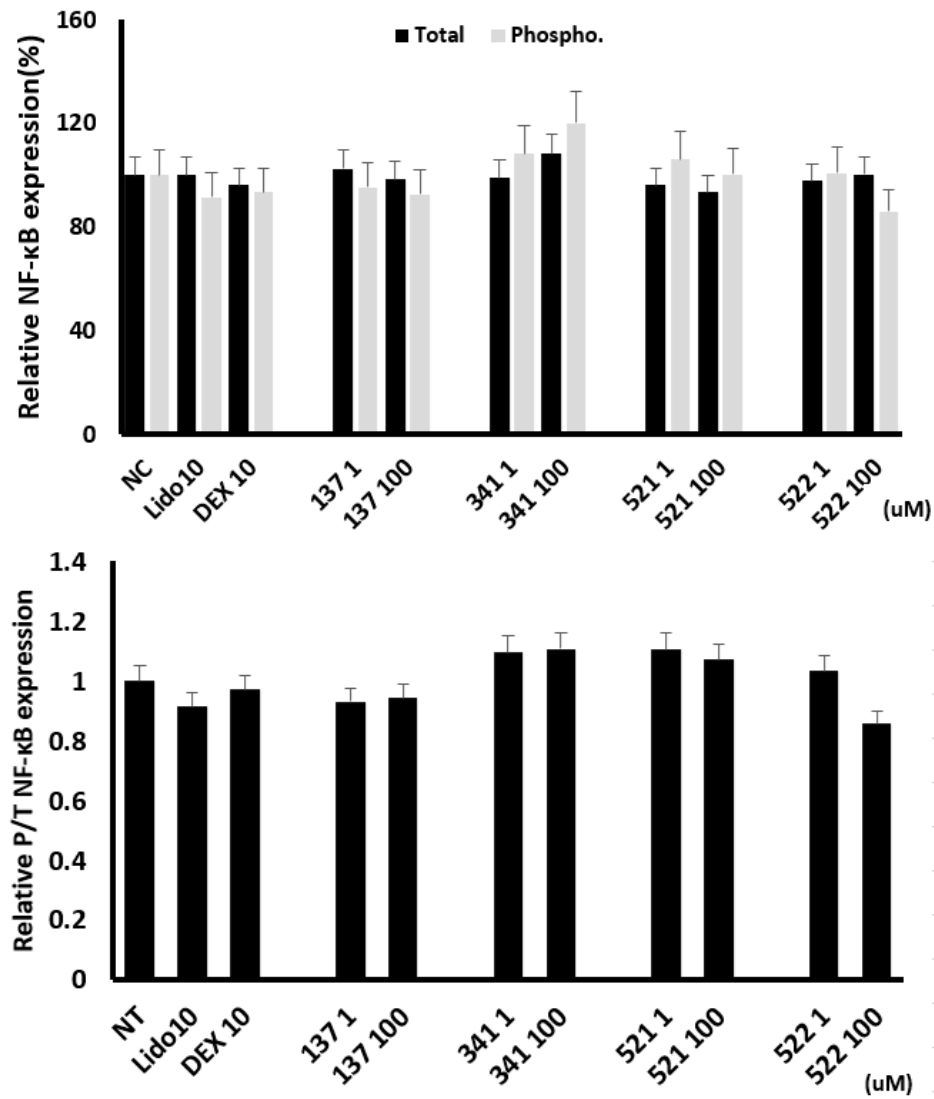

Figure S2. The effects of lidocaine analogs on IL-5-induced total and phosphorylated NF-κB expression in eosinophils. The compounds did not influence IL-5-induced phosphorylated NF-κB expression and relative phosphorylated/total NF-κB expression in eosinophils. NT, not-treated; Lido, lidocaine; DEX, dexamethasone, group, n = 7.

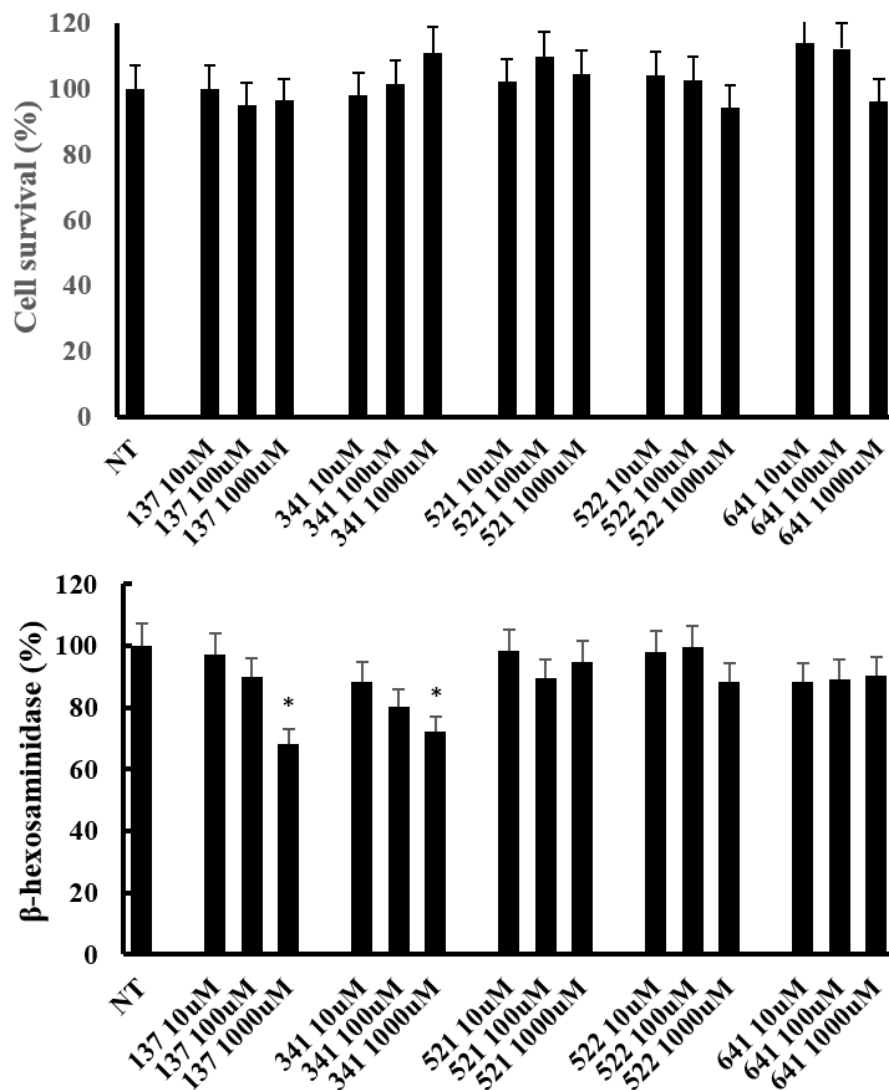

Figure S3: The effects of lidocaine-derived organic compounds on RBL-2H3 cell survival and degranulation. Organic compounds did not influence the survival of RBL-2H3 cells. At a dose of 1,000  $\mu$ M, compounds 137 and 341 significantly inhibited the release of  $\beta$ -hexosaminidase from RBL-2H3 cells. NT, not-treated; \*  $p < 0.05$  compared with the NT group,  $n = 7$ .
